# Supplementary material for: IrOx·nH2O with lattice water–assisted oxygen exchange for high-performance proton exchange membrane water electrolyzers
Source: PubMed Central journal article supplement (PMC10289644; doi:10.1126/sciadv.adh1718), 2023-06-23
Supplement: sciadv.adh1718_sm.pdf [file sciadv.adh1718_sm.pdf]

Supplementary Materials for  
**IrO<sub>x</sub>·nH<sub>2</sub>O with lattice water–assisted oxygen exchange for high-performance  
proton exchange membrane water electrolyzers**

Jun Xu *et al.*

Corresponding author: Yao Zheng, [yao.zheng01@adelaide.edu.au](mailto:yao.zheng01@adelaide.edu.au); Shi-Zhang Qiao, [s.qiao@adelaide.edu.au](mailto:s.qiao@adelaide.edu.au)

*Sci. Adv.* **9**, eadh1718 (2023)  
DOI: 10.1126/sciadv.adh1718

**This PDF file includes:**

Figs. S1 to S23  
Tables S1 to S3

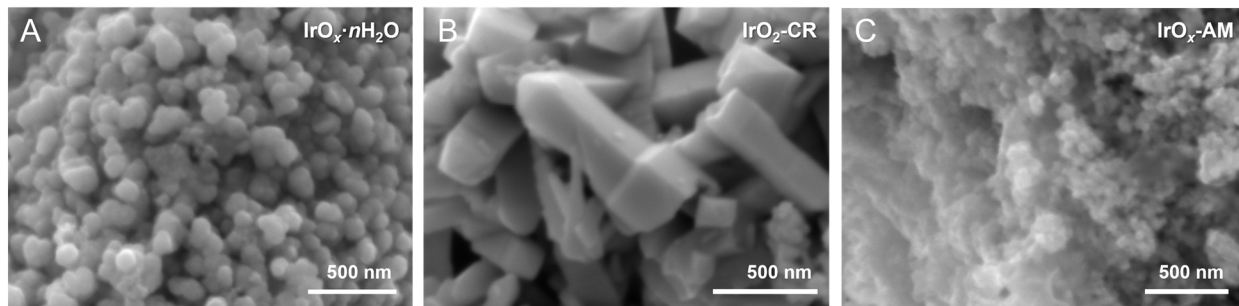

**Fig. S1. SEM images. (A) IrO<sub>x</sub> · nH<sub>2</sub>O, (B) IrO<sub>2</sub>-CR and (C) IrO<sub>x</sub>-AM.**

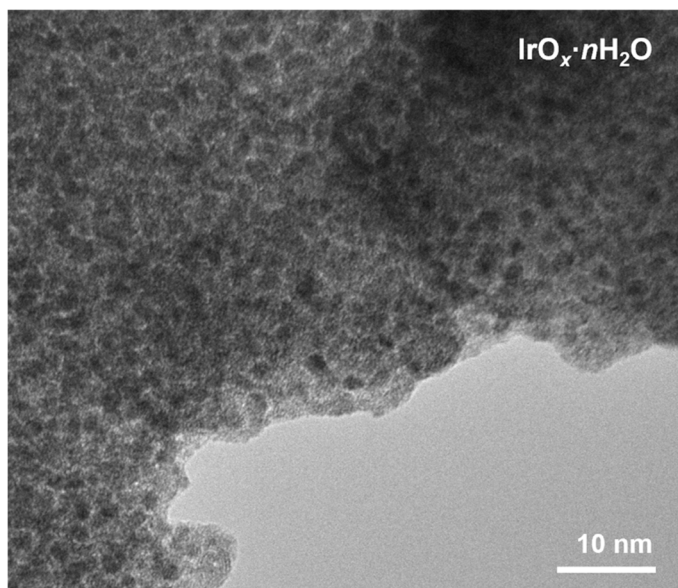

**Fig. S2. TEM image of IrO<sub>x</sub> · nH<sub>2</sub>O.**

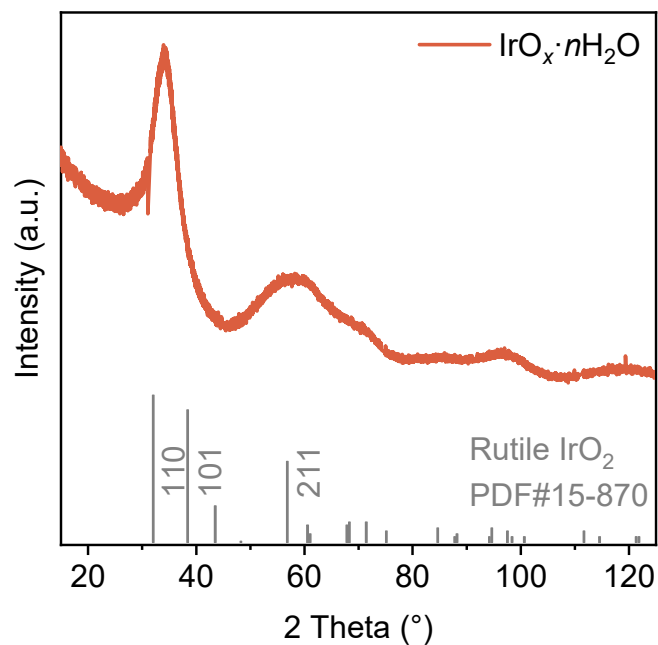

**Fig. S3. Powder diffraction pattern of  $\text{IrO}_x \cdot n\text{H}_2\text{O}$ .** All PD data in this work were converted to the range of Cu  $K\alpha$  (1.54 Å) corresponding to Bragg's Law.

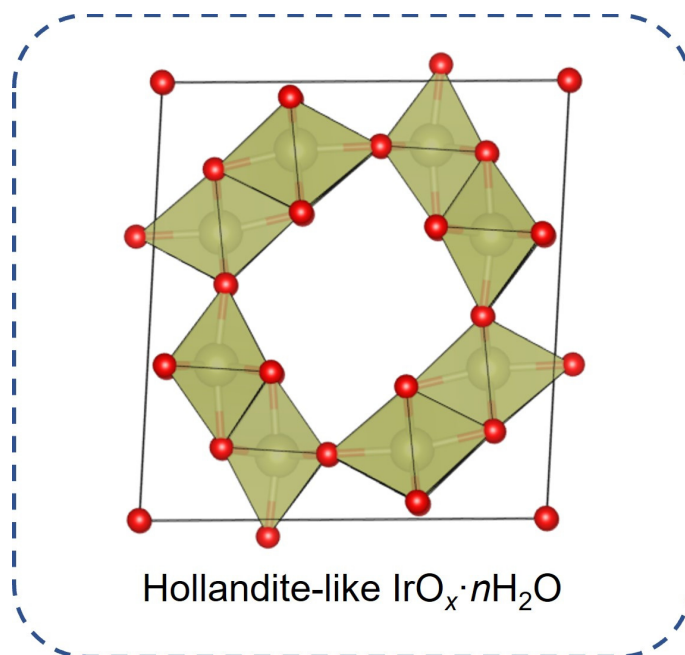

**Fig. S4. Schematic for structure for hollandite-like  $\text{IrO}_x \cdot n\text{H}_2\text{O}$ .**

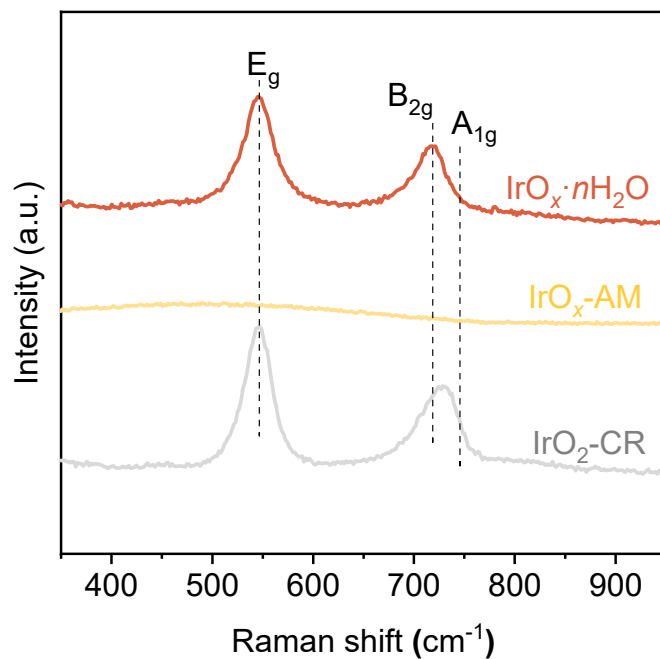

**Fig. S5.** Raman spectra of  $\text{IrO}_x \cdot n\text{H}_2\text{O}$ ,  $\text{IrO}_2\text{-AM}$  and  $\text{IrO}_x\text{-CR}$ .

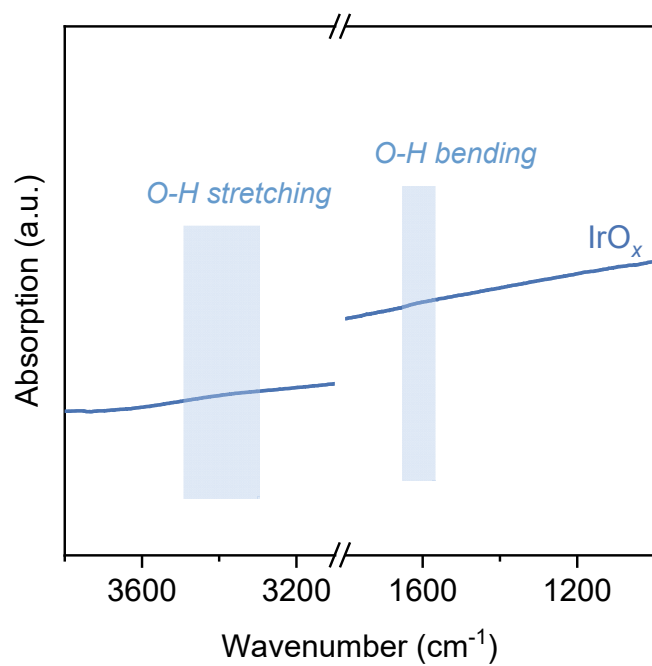

**Fig. S6.** FTIR spectrum of  $\text{IrO}_x$ .

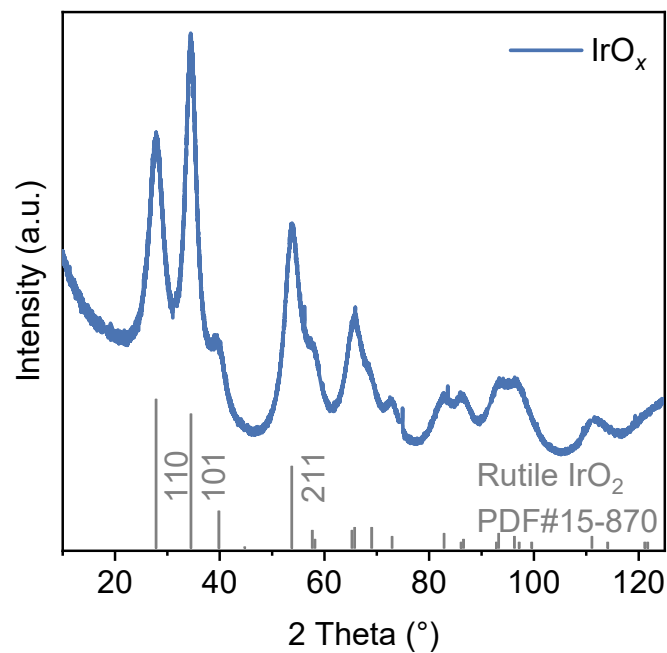

**Fig. S7. Powder diffraction pattern of IrO<sub>x</sub>.**

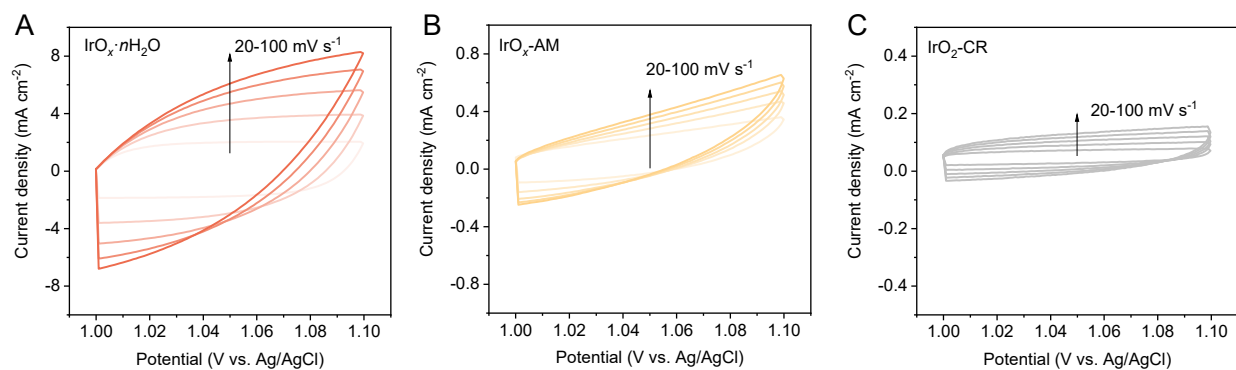

**Fig. S8. CV curves at different scan rates in a non-Faradic region. (A) IrO<sub>x</sub>·nH<sub>2</sub>O, (B) IrO<sub>x</sub>-AM and (C) IrO<sub>2</sub>-CR.**

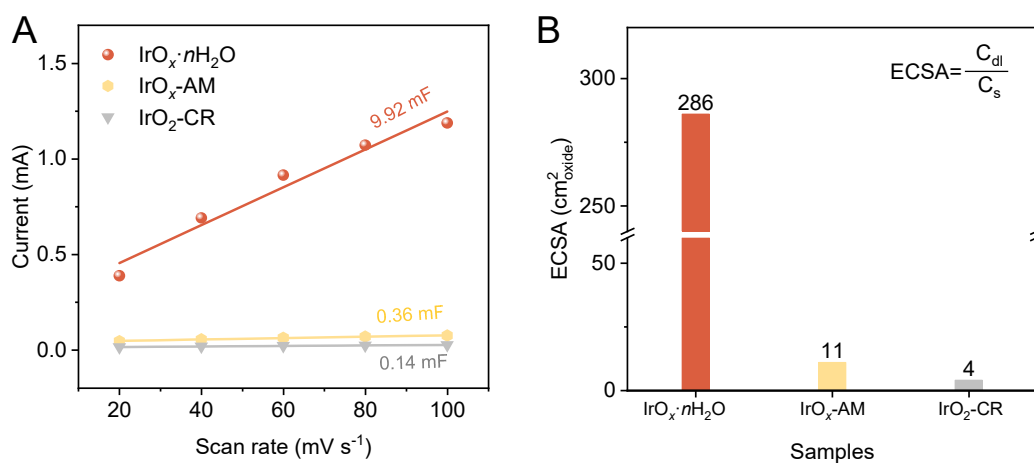

**Fig. S9. Electrochemical active area (ECSA) analyses.** (A) Double-layer capacitance ( $C_{dl}$ ) represented by curve slope and (B) ECSA comparison.

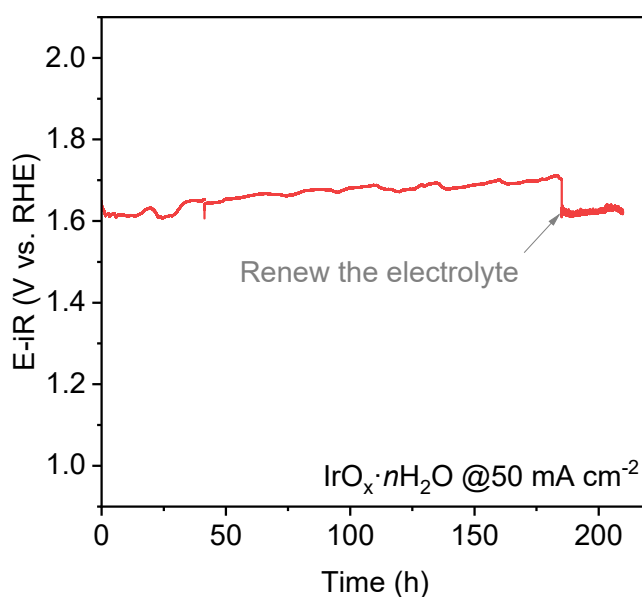

**Fig. S10. Chronopotentiometry curve of IrO<sub>x</sub>·nH<sub>2</sub>O at 50 mA cm<sup>-2</sup> in the three-electrode system.** A platinized titanium felt as the stable substrate of the working electrode was used to increase the contact between catalysts and substrates.

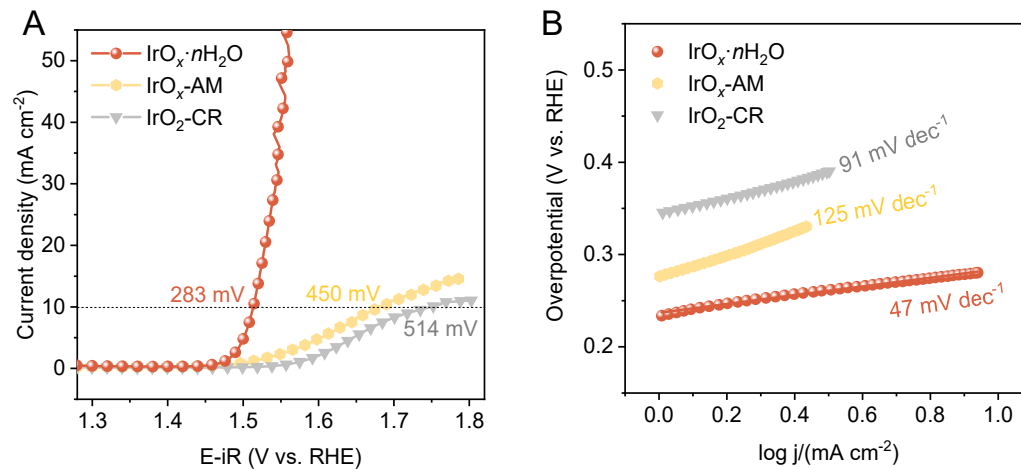

**Fig. S11. Tafel plots analyses.** (A) LSV curves normalized by geometric area, (B) Tafel plots from (A) of IrO<sub>x</sub>·nH<sub>2</sub>O, IrO<sub>x</sub>-AM and IrO<sub>2</sub>-CR.

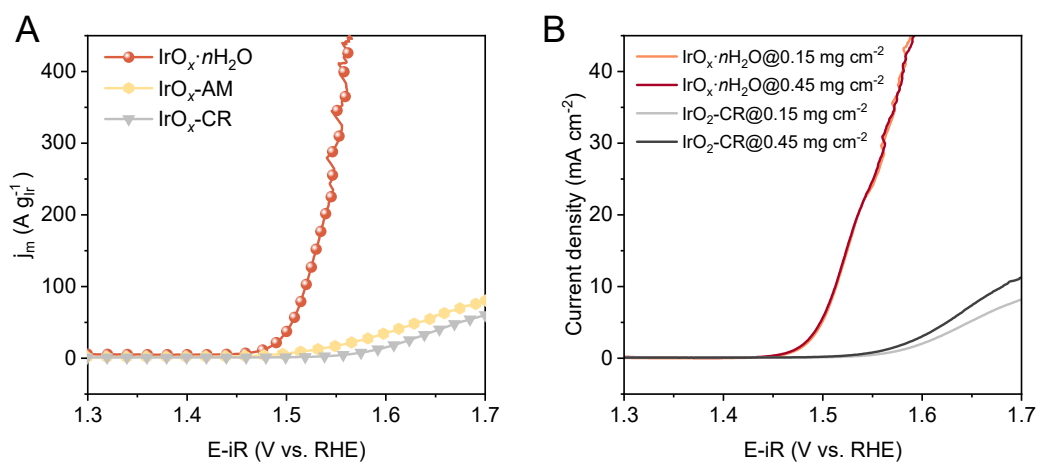

**Fig. S12. Mass activity analyses.** (A) Mass activity of IrO<sub>x</sub>·nH<sub>2</sub>O, IrO<sub>x</sub>-AM and IrO<sub>2</sub>-CR. (B) LSV curves normalized by geometric area with different loading.

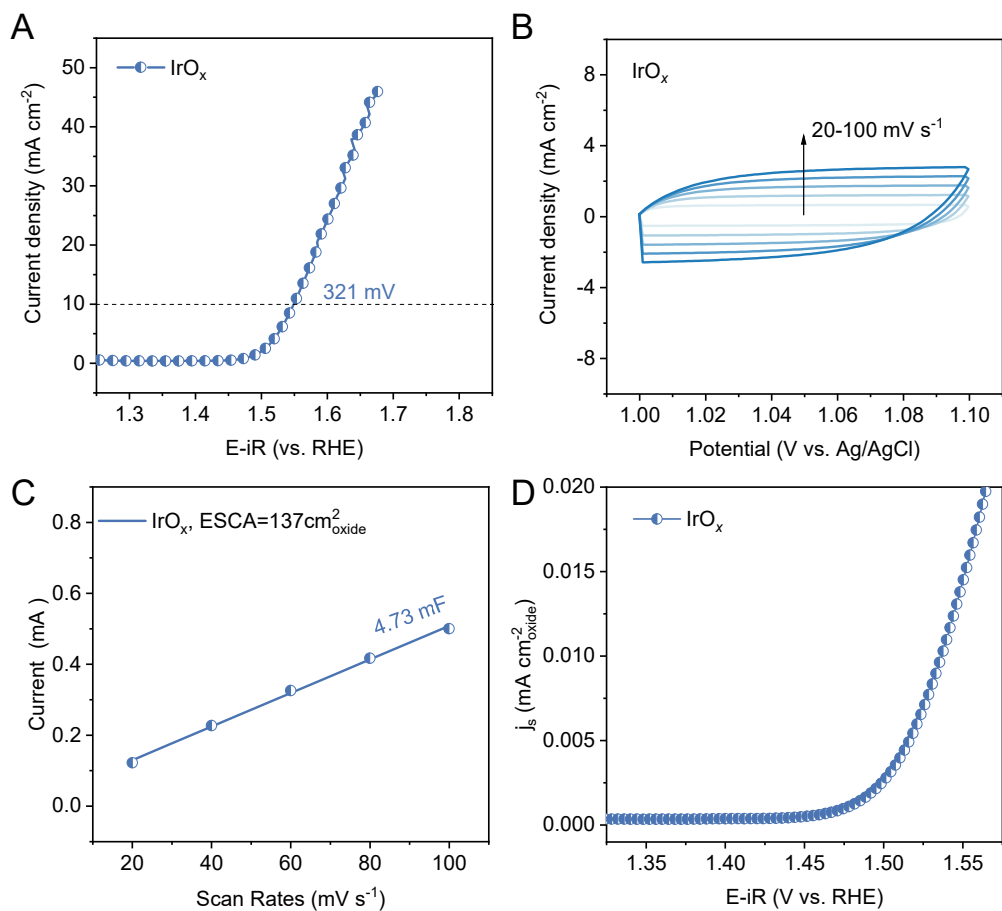

**Fig. S13. Electrochemical measurements of  $\text{IrO}_x$ .** (A) LSV curves normalized by geometric area. (B) CV curves with different scan rates in a non-Faradic region. (C) Double-layer capacitance ( $C_{dl}$ ) represented by curve slope. (D) LSV curves normalized by ECSA.



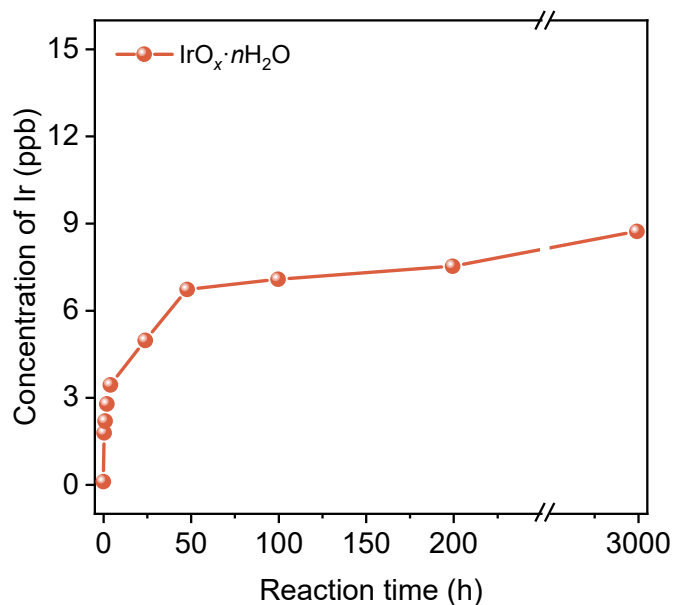

**Fig. S14. Dissolved Ir of  $\text{IrO}_x \cdot n\text{H}_2\text{O}$  in electrolyte following chronopotentiometry test (@10  $\text{mA cm}^{-2}$ ).**

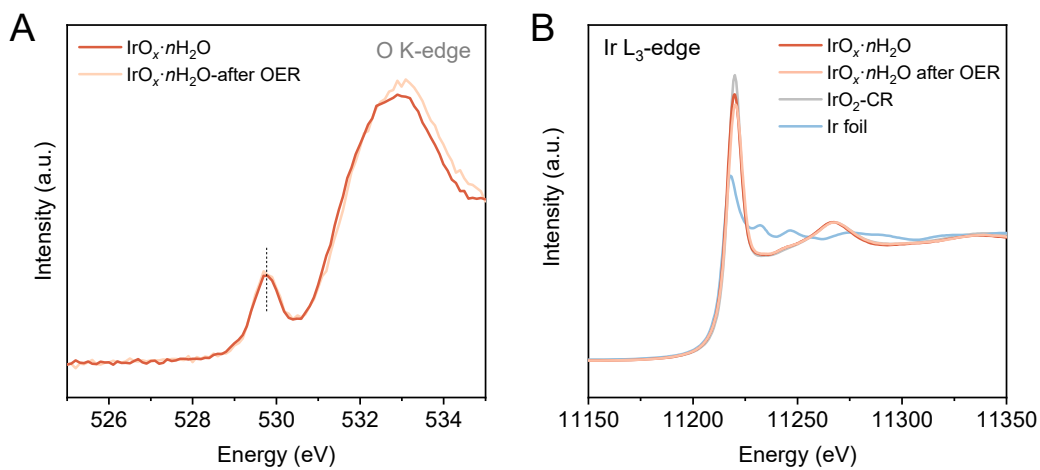

**Fig. S15. Ex-situ XAS measurements on  $\text{IrO}_x \cdot n\text{H}_2\text{O}$  prior to and following OER. (A) O K-edge and (B) Ir  $L_3$ -edge.**

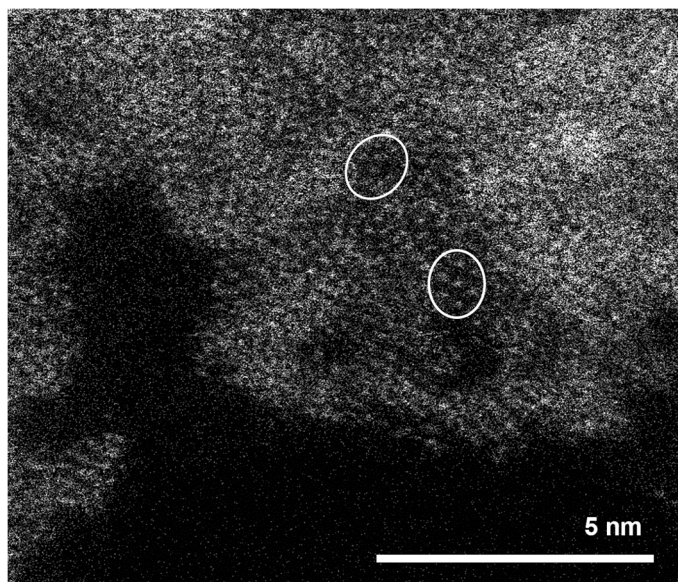

**Fig. S16. HAADF-STEM image of  $\text{IrO}_x \cdot n\text{H}_2\text{O}$  following OER test.**

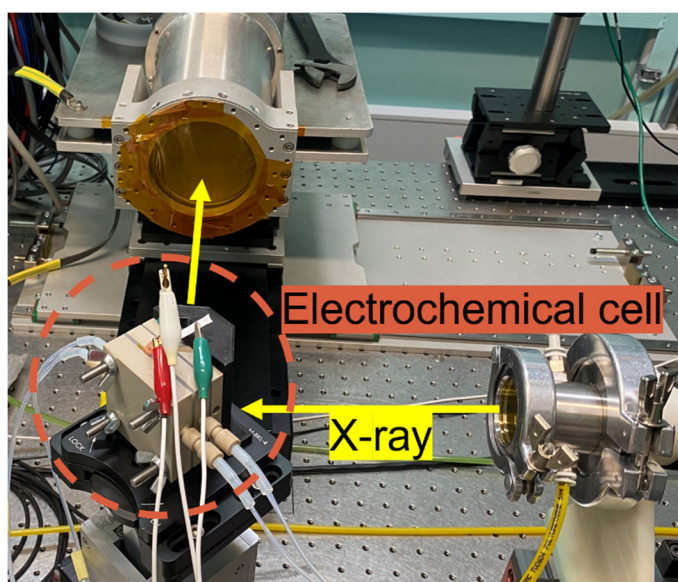

**Fig. S17. Operando XAS setup.**

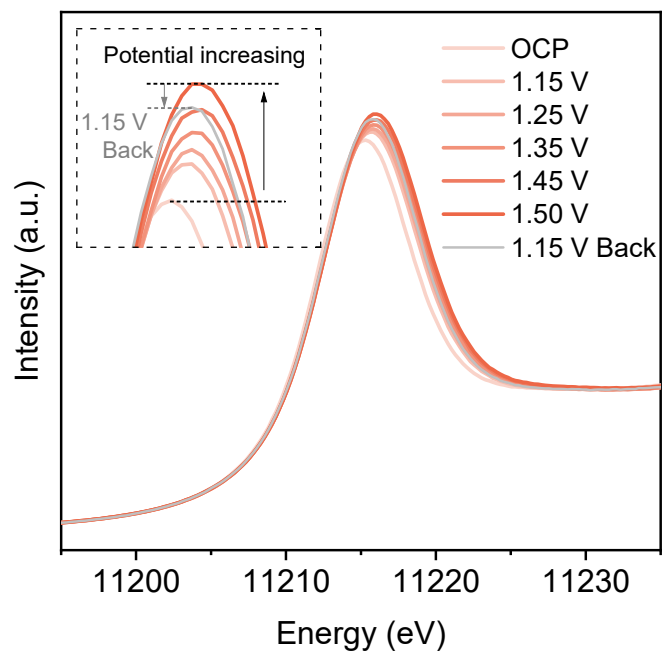

**Fig. S18. Operando XANES spectra of  $\text{IrO}_x \cdot n\text{H}_2\text{O}$  under potential range of OCP ~ 1.50 V vs. RHE.**

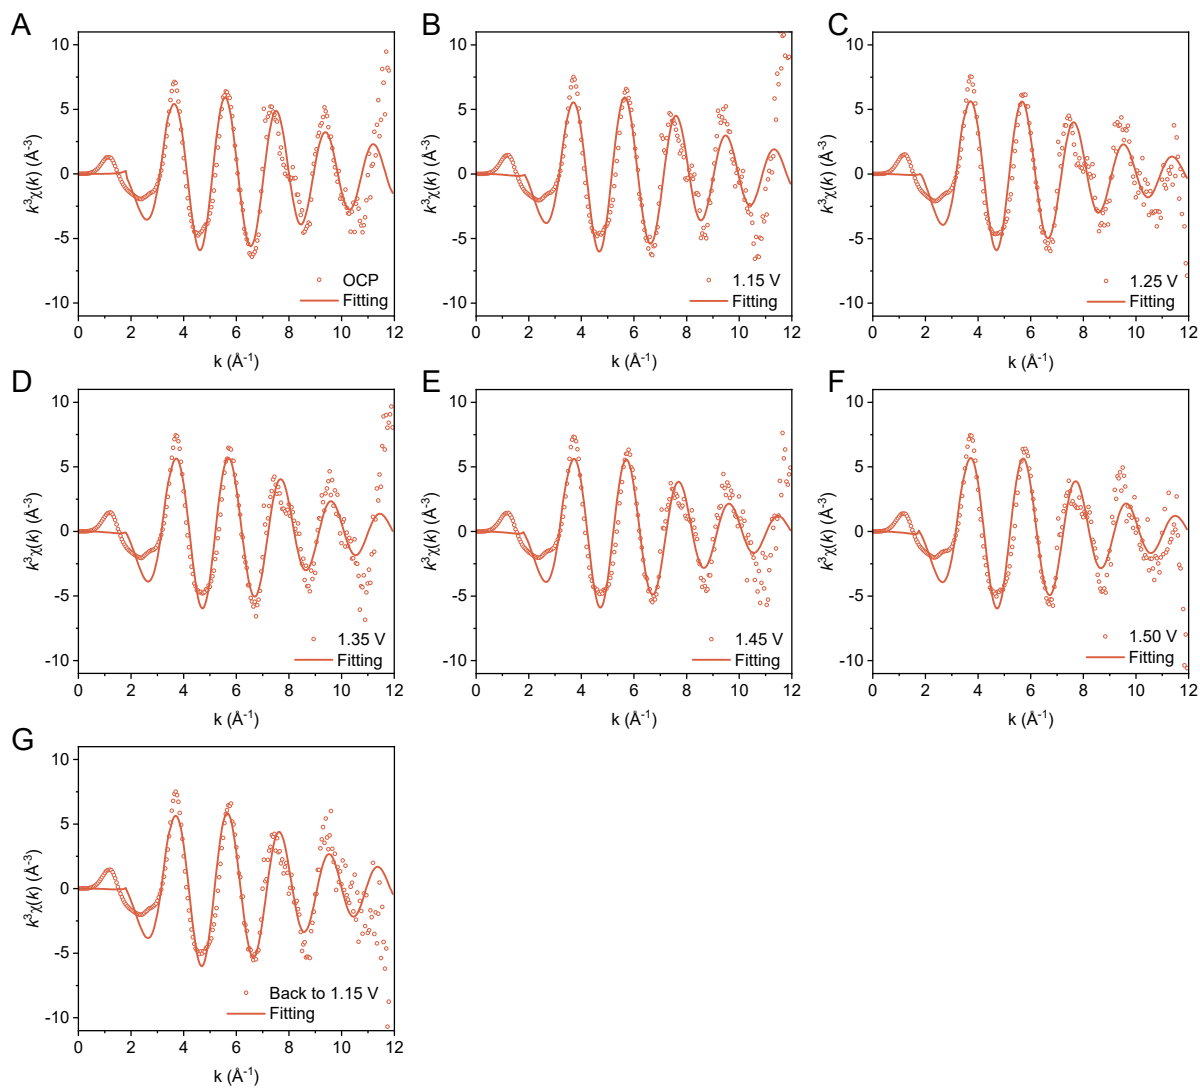

**Fig. S19. Fitting data for operando XAS of  $\text{IrO}_x \cdot n\text{H}_2\text{O}$ .** Ir  $L_3$ -edge EXAFS under different potentials fitting results at  $R$  space. Best-fit parameters are collected in Table S2.

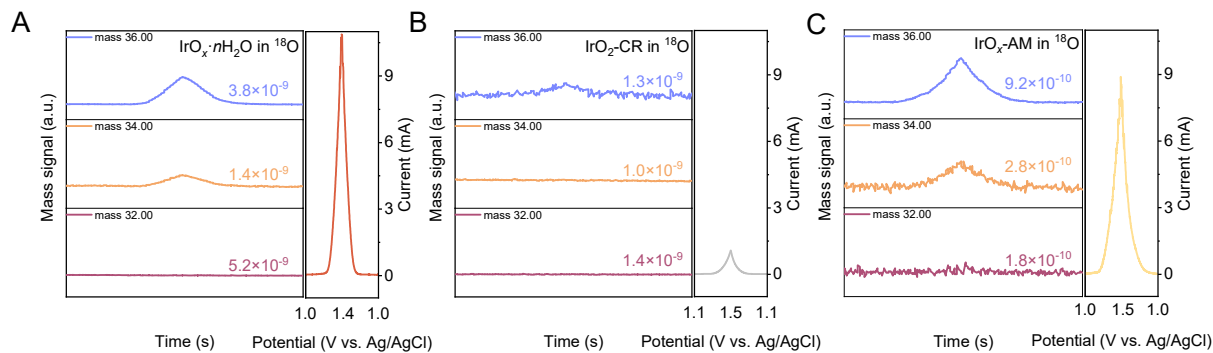

**Fig. S20. DEMS results.** Signals of  $\text{O}_2$  products with corresponding CV curves in  $\text{H}_2^{18}\text{O}$  supporting 0.05 M  $\text{H}_2\text{SO}_4$  for (A)  $\text{IrO}_x \cdot n\text{H}_2\text{O}$ , (B)  $\text{IrO}_2\text{-CR}$  and (C)  $\text{IrO}_x\text{-AM}$ .

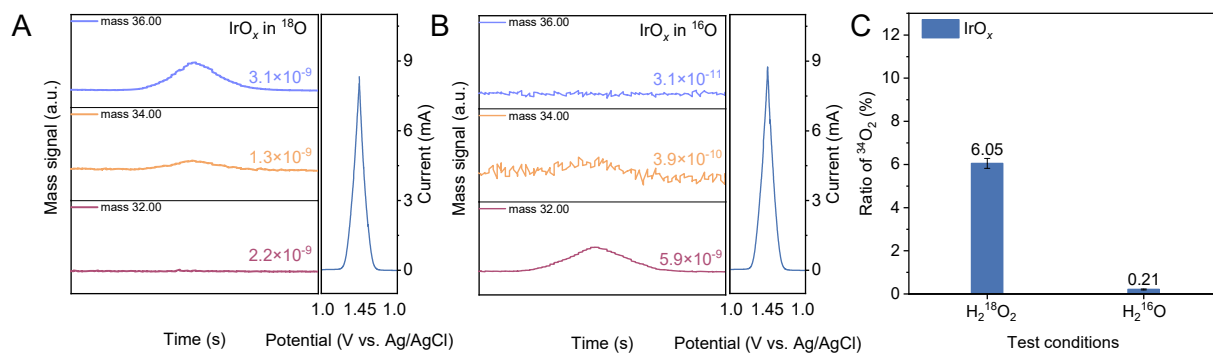

**Fig. S21. Online DEMS signal for  $\text{IrO}_x$  under 0.05 M  $\text{H}_2\text{SO}_4$  with different solvents.** (A)  $\text{H}_2^{18}\text{O}$  as solvent. (B)  $\text{H}_2^{16}\text{O}$  as solvent. (C) Comparison of  $^{34}\text{O}_2$  produced from 0.05 M  $\text{H}_2\text{SO}_4$  using  $\text{H}_2^{18}\text{O}$  and  $\text{H}_2^{16}\text{O}$  as solvents.

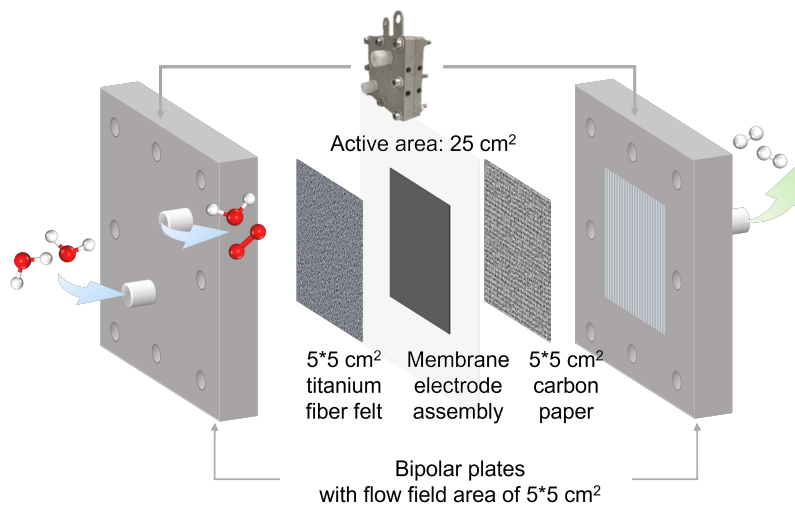

**Fig. S22. Schematic for PEM electrolyzer.**

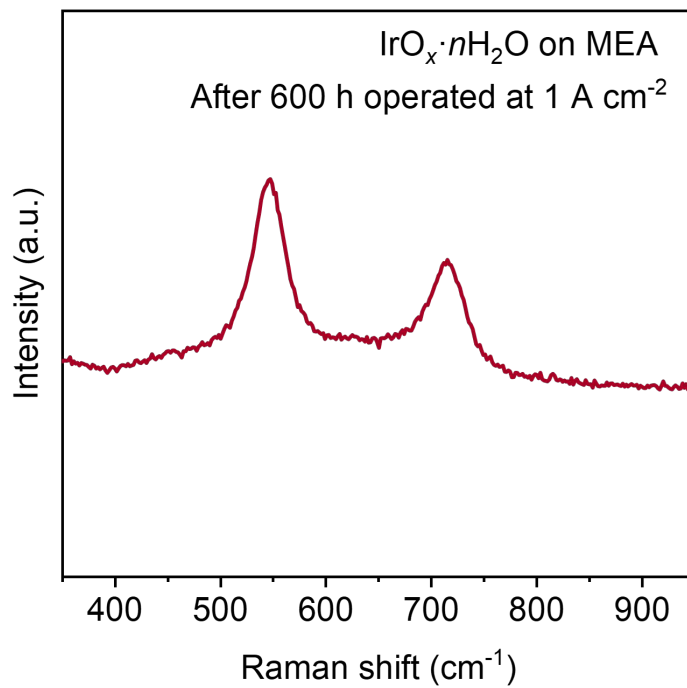

**Fig. S23. Post Raman spectrum of MEA coated with IrO<sub>x</sub>·nH<sub>2</sub>O.**

**Table S1. Comparative summary of  $\text{IrO}_x \cdot n\text{H}_2\text{O}$  with selected Ir-based electrocatalysts for acidic OER reported in three-electrode system.**

| Catalyst                                                                  | Electrolyte                   | Mass loading<br>( $\text{mg cm}^{-2}$ ) | Overpotential at<br>corresponding j     | Stability<br>(@10 $\text{mA cm}^{-2}$ ) | Reference |
|---------------------------------------------------------------------------|-------------------------------|-----------------------------------------|-----------------------------------------|-----------------------------------------|-----------|
| $\text{IrO}_x \cdot n\text{H}_2\text{O}$                                  | 0.1 M $\text{HClO}_4$         | 0.15                                    | $\eta_{10} = 283 \text{ mV}$            | 5700 h                                  | This work |
| $\text{IrO}_x/\text{SrIrO}_3$                                             | 0.5 M $\text{H}_2\text{SO}_4$ | --                                      | $\eta_{10} = 270\text{-}290 \text{ mV}$ | 30 h                                    | (30)      |
| $\text{Li-IrO}_x$                                                         | 0.5 M $\text{H}_2\text{SO}_4$ | 0.125                                   | $\eta_{10} = 270 \text{ mV}$            | 10 h                                    | (34)      |
| $\text{IrO}_2/\text{GCN}$                                                 | 0.5 M $\text{H}_2\text{SO}_4$ | 0.204                                   | $\eta_{10} = 276 \text{ mV}$            | 4 h (20 $\text{mA cm}^{-2}$ )           | (32)      |
| GB-<br>$\text{Ta}_{0.1}\text{Tm}_{0.1}\text{Ir}_{0.8}\text{O}_{2-\delta}$ | 0.5 M $\text{H}_2\text{SO}_4$ | 0.04                                    | $\eta_{10} = 198 \text{ mV}$            | 500 h                                   | (37)      |
| $\text{Ir/Nb}_2\text{O}_{5-x}$                                            | 0.5 M $\text{H}_2\text{SO}_4$ | 0.128                                   | $\eta_{10} = 245 \text{ mV}$            | 105 h                                   | (38)      |
| $\text{SrCo}_{0.9}\text{Ir}_{0.1}\text{O}_{3-\delta}$                     | 0.1 M $\text{HClO}_4$         | 0.255                                   | $\eta_{16.3} = 320 \text{ mV}$          | 1.5 h                                   | (33)      |
| 1T- $\text{IrO}_2$                                                        | 0.5 M $\text{H}_2\text{SO}_4$ | 0.207                                   | $\eta_{10} = 197 \text{ mV}$            | 45 h (50 $\text{mA cm}^{-2}$ )          | (35)      |
| $\text{Ba}_2\text{YIrO}_6$                                                | 0.1 M $\text{HClO}_4$         | 0.015                                   | $\eta_{10} = 315 \text{ mV}$            | 1 h                                     | (29)      |
| Ir NSs                                                                    | 0.1 M $\text{HClO}_4$         | 0.204                                   | $\eta_{10} = 255 \text{ mV}$            | 8 h                                     | (36)      |
| 6H- $\text{SrIrO}_3$                                                      | 0.5 M $\text{H}_2\text{SO}_4$ | 0.90                                    | $\eta_{10} = 248 \text{ mV}$            | 30 h                                    | (31)      |

**Table S2. Operando EXAFS fitted parameters at Ir  $L_3$ -edge of  $\text{IrO}_x \cdot n\text{H}_2\text{O}$ .** Artimise software together with standard procedure(s) was used for fits, and all  $|\Delta E_0|$  were confirmed below 10 eV.  $N$  is the coordination number,  $\sigma^2$  Debye-Waller factor,  $R$  coordination distance and  $R$ -factor relative error for fit.

| $E$<br>(V vs. RHE) | Scattering<br>path | $N$   | $\Delta R$ | $R$<br>( $\text{\AA}$ ) | $\sigma^2$<br>( $10^{-3} \text{\AA}^2$ ) | $R$ -factor |
|--------------------|--------------------|-------|------------|-------------------------|------------------------------------------|-------------|
| OCP                | Ir-O               | 5.667 | 0.069      | 2.027                   | 5.5                                      | 0.0162      |
| 1.15               | Ir-O               | 5.680 | 0.053      | 2.011                   | 6.1                                      | 0.0195      |
| 1.25               | Ir-O               | 6.056 | 0.046      | 2.004                   | 7.7                                      | 0.0202      |
| 1.35               | Ir-O               | 6.082 | 0.030      | 1.988                   | 7.6                                      | 0.0161      |
| 1.45               | Ir-O               | 6.139 | 0.028      | 1.986                   | 8.1                                      | 0.0172      |
| 1.50               | Ir-O               | 6.235 | 0.025      | 1.983                   | 8.1                                      | 0.0206      |
| 1.15               | Ir-O               | 5.949 | 0.045      | 2.003                   | 6.8                                      | 0.0172      |

**Table S3. Summary comparison of PEM electrolyzer performance with selected reports.**

| <b>Anode catalyst</b>                                                  | <b>Mass loading /(<math>\text{mg cm}^{-2}</math>)</b> | <b>Membrane</b> | <b>Operating temperature /<math>^{\circ}\text{C}</math></b> | <b>Cell voltage at 1 A <math>\text{cm}^{-2}</math>/V</b> | <b>Stability /(<math>\text{h @ A cm}^{-2}</math>)</b> | <b>Cost /(<math>\text{USD per kg of H}_2</math>)</b> | <b>Energy consumption /<math>\text{kWh m}^{-3} \text{H}_2</math></b> | <b>Reference</b> |
|------------------------------------------------------------------------|-------------------------------------------------------|-----------------|-------------------------------------------------------------|----------------------------------------------------------|-------------------------------------------------------|------------------------------------------------------|----------------------------------------------------------------------|------------------|
| $\text{IrO}_x \cdot n\text{H}_2\text{O}$                               | 2.0                                                   | N115            | 60                                                          | 1.77                                                     | 600@1.0                                               | 0.95                                                 | 4.27                                                                 | This work        |
| $\text{IrO}_2$                                                         | 3.0                                                   | N115            | 60                                                          | 1.83                                                     | --                                                    | --                                                   | --                                                                   | This work        |
| Pt/ $\text{IrO}_2$                                                     | 1.8                                                   | N117            | 60                                                          | 1.81                                                     | --                                                    | --                                                   | --                                                                   | (47)             |
| GB- $\text{Ta}_{0.1}\text{Ti}_{0.1}\text{Ir}_{0.8}\text{O}_{2-\delta}$ | 0.2                                                   | N117            | 50                                                          | 1.766                                                    | 500@1.5                                               | 1.002                                                | 4.51                                                                 | (37)             |
| GB- $\text{IrO}_{2-\delta}$                                            | 0.2                                                   | N117            | 50                                                          | 1.946                                                    | --                                                    | --                                                   | --                                                                   | (37)             |
| $\text{Ir/Nb}_2\text{O}_{5-x}$                                         | 1.80                                                  | N115            | 80                                                          | $\sim 1.65$                                              | 2,000@2.0                                             | 0.984                                                | 4.43                                                                 | (38)             |
| Ir Black                                                               | 2.0                                                   | N117            | 90                                                          | 1.71                                                     | --                                                    | --                                                   | --                                                                   | (48)             |
| Ir AC/NN                                                               | 1.0                                                   | N212            | 80                                                          | 1.58                                                     | 90@3                                                  | --                                                   | --                                                                   | (49)             |
| $\text{IrO}_2$ NN                                                      | 1.0                                                   | N212            | 80                                                          | 1.64                                                     | 90@3                                                  | --                                                   | --                                                                   | (49)             |
| $\text{IrO}_2$ (Adams)                                                 | 1.0                                                   | N212            | 80                                                          | 1.66                                                     | < 90@3                                                | --                                                   | --                                                                   | (49)             |
| $\text{IrO}_x$                                                         | 1.5                                                   | N115            | 60                                                          | $\sim 1.70$                                              | --                                                    | --                                                   | --                                                                   | (50)             |
| $\text{Ir}_{0.2}\text{Ru}_{0.8}\text{O}_2$                             | 1.5                                                   | N115            | 80                                                          | 1.676                                                    | 140@0.5                                               | --                                                   | --                                                                   | (51)             |
